# Supplementary material for: Dissemination of Verona Integron-encoded Metallo-β-lactamase among clinical and environmental Enterobacteriaceae isolates in Ontario, Canada
Source: PubMed Central journal article supplement (PMC7596063; doi:10.1038/s41598-020-75247-7), 2020-10-29
Supplement: 41598_2020_75247_MOESM1_ESM.pdf [file 41598_2020_75247_MOESM1_ESM.pdf]

# Dissemination of Verona Integron–encoded Metallo- $\beta$ -Lactamase among Clinical and Environmental Enterobacteriaceae Isolates in Ontario, Canada

Philipp Kohler, Nathalie Tijet, Hyunjin C. Kim, Jennie Johnstone, Tom Edge, Samir N. Patel, Christine Seah, Barbara Willey, Brenda Coleman, Karen Green, Irene Armstrong, Kevin Katz, Matthew P. Muller, Jeff Powis, Susan M. Poutanen, David Richardson, Alicia Sarabia, Andrew Simor, Allison McGeer, Roberto G. Melano, for the Toronto Invasive Bacterial Diseases Network (TIBDN)

## Supplementary Figures and Tables

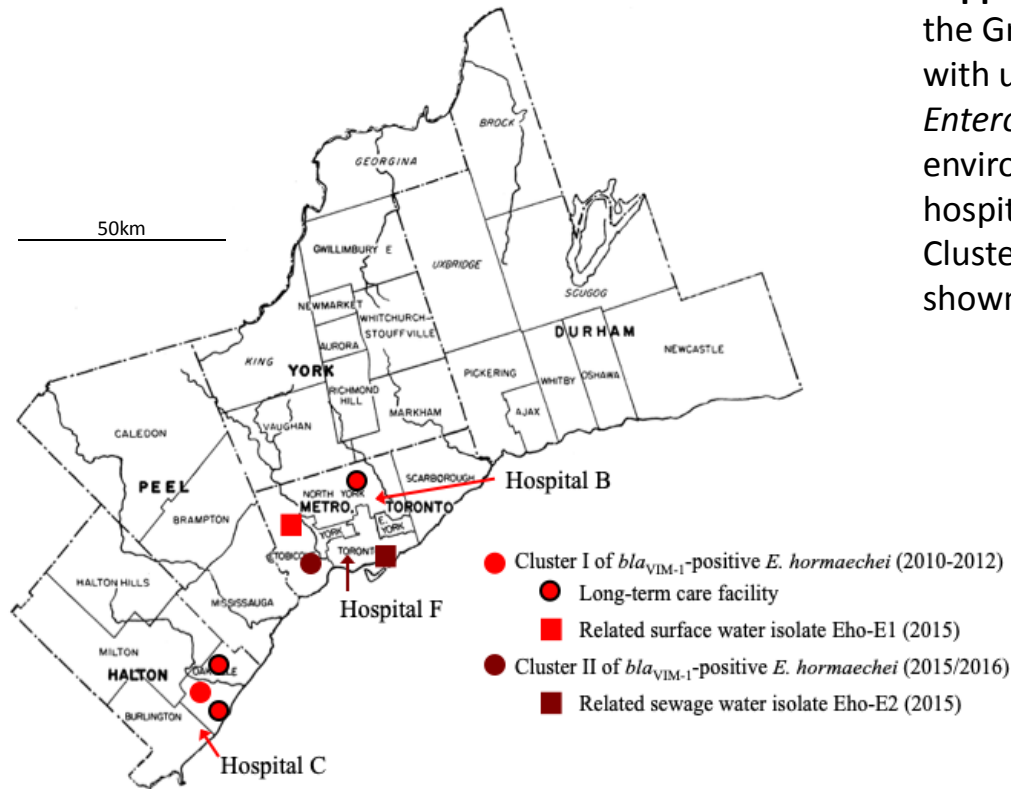

**Supplementary Figure 1.** Place of residence within the Greater Toronto Area, Canada, of five patients with unexplained acquisition of *bla*<sub>VIM-1</sub>-positive *Enterobacter hormaechei* (circles) and site of environmental water sampling (squares). Involved hospitals (arrows) are depicted by arrows. Clustering based on multilocus sequence typing is shown in bright (cluster I) and dark red (cluster II).

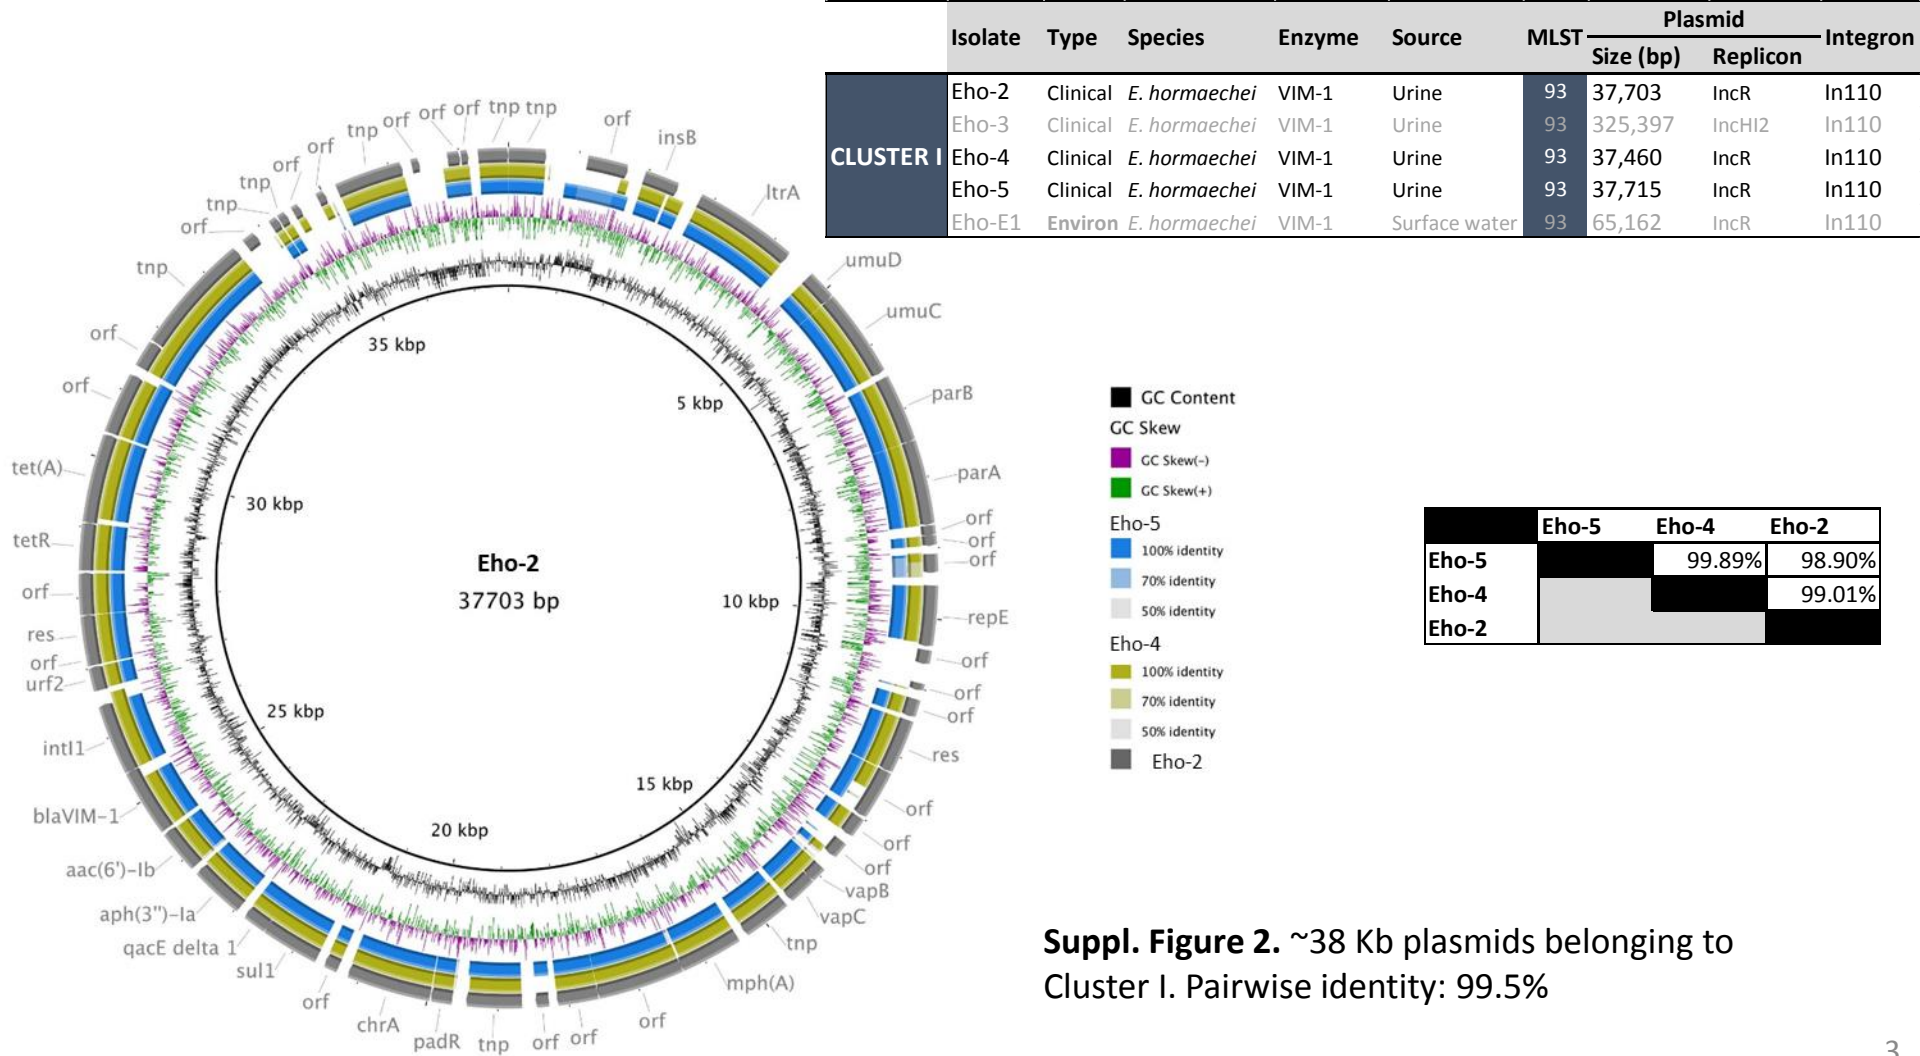

**Suppl. Figure 2.** ~38 Kb plasmids belonging to Cluster I. Pairwise identity: 99.5%

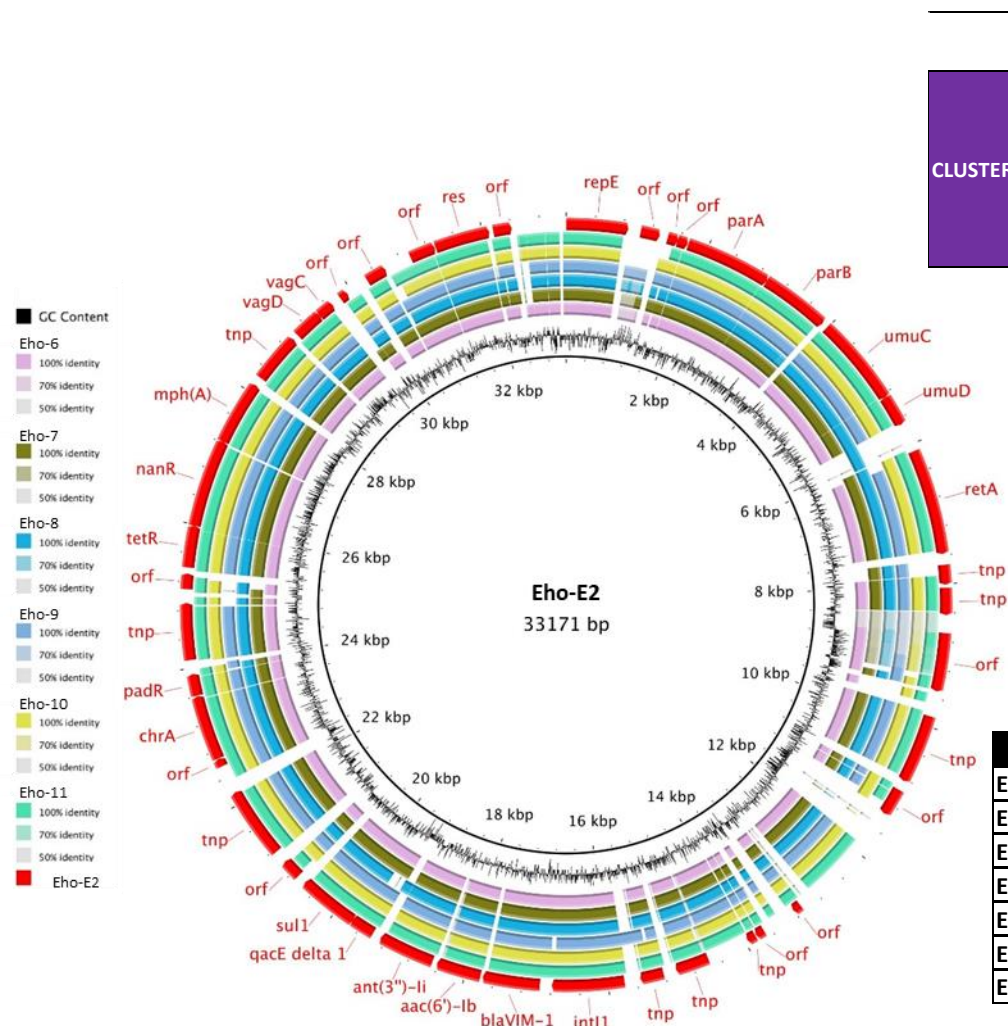

|                   | Isolate | Type     | Species              | Enzyme | Source         | MLST | Plasmid   |          | Integron |
|-------------------|---------|----------|----------------------|--------|----------------|------|-----------|----------|----------|
|                   |         |          |                      |        |                |      | Size (bp) | Replicon |          |
| <b>CLUSTER II</b> | Eho-6   | Clinical | <i>E. hormaechei</i> | VIM-1  | Rectal         | 269  | 33,171    | IncR     | In110    |
|                   | Eho-7   | Clinical | <i>E. hormaechei</i> | VIM-1  | Urine          | 269  | 33,060    | IncR     | In110    |
|                   | Eho-8   | Clinical | <i>E. hormaechei</i> | VIM-1  | Dialysis fluid | 269  | 32,990    | IncR     | In110    |
|                   | Eho-9   | Clinical | <i>E. hormaechei</i> | VIM-1  | Dialysis fluid | 269  | 33,024    | IncR     | In110    |
|                   | Eho-10  | Clinical | <i>E. hormaechei</i> | VIM-1  | Rectal         | 269  | 33,171    | IncR     | In110    |
|                   | Eho-11  | Clinical | <i>E. hormaechei</i> | VIM-1  | Rectal         | 269  | 32,697    | IncR     | In110    |
|                   | Eho-E2  | Environ  | <i>E. hormaechei</i> | VIM-1  | Sewage water   | 269  | 33,171    | IncR     | In110    |

**Suppl. Figure 3.** ~33 Kb plasmids belonging to Cluster II. Pairwise identity: 99.2%

|        | Eho-7 | Eho-9  | Eho-11 | Eho-10 | Eho-E2 | Eho-6  | Eho-8  |
|--------|-------|--------|--------|--------|--------|--------|--------|
| Eho-7  |       | 99.89% | 98.90% | 99.23% | 99.67% | 99.33% | 99.33% |
| Eho-9  |       |        | 99.01% | 99.34% | 99.55% | 99.22% | 99.44% |
| Eho-11 |       |        |        | 99.66% | 98.57% | 98.24% | 99.09% |
| Eho-10 |       |        |        |        | 98.90% | 98.57% | 99.43% |
| Eho-E2 |       |        |        |        |        | 99.67% | 99.42% |
| Eho-6  |       |        |        |        |        |        | 99.09% |
| Eho-8  |       |        |        |        |        |        |        |

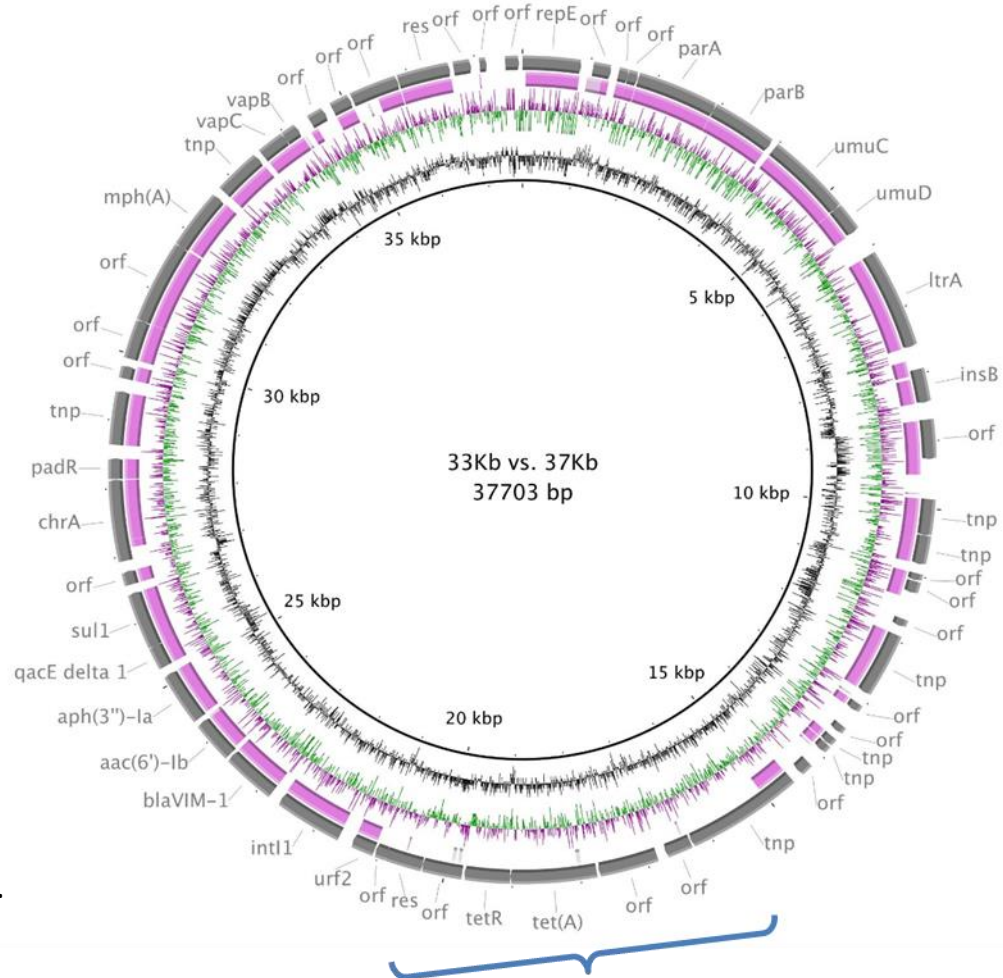

**Suppl. Figure 4.** Comparison of plasmids from Cluster I (Eho-2, ~37.7 kb) vs. Cluster II (isolate Eho-E2, ~33.2 kb). A ~6.3 kb DNA fragment containing the *tetAR* genes encoding for the tetracycline efflux protein TetA and its repressor TetR is missing in Eho-E2.





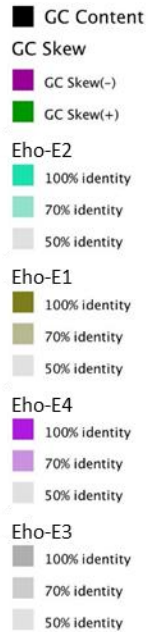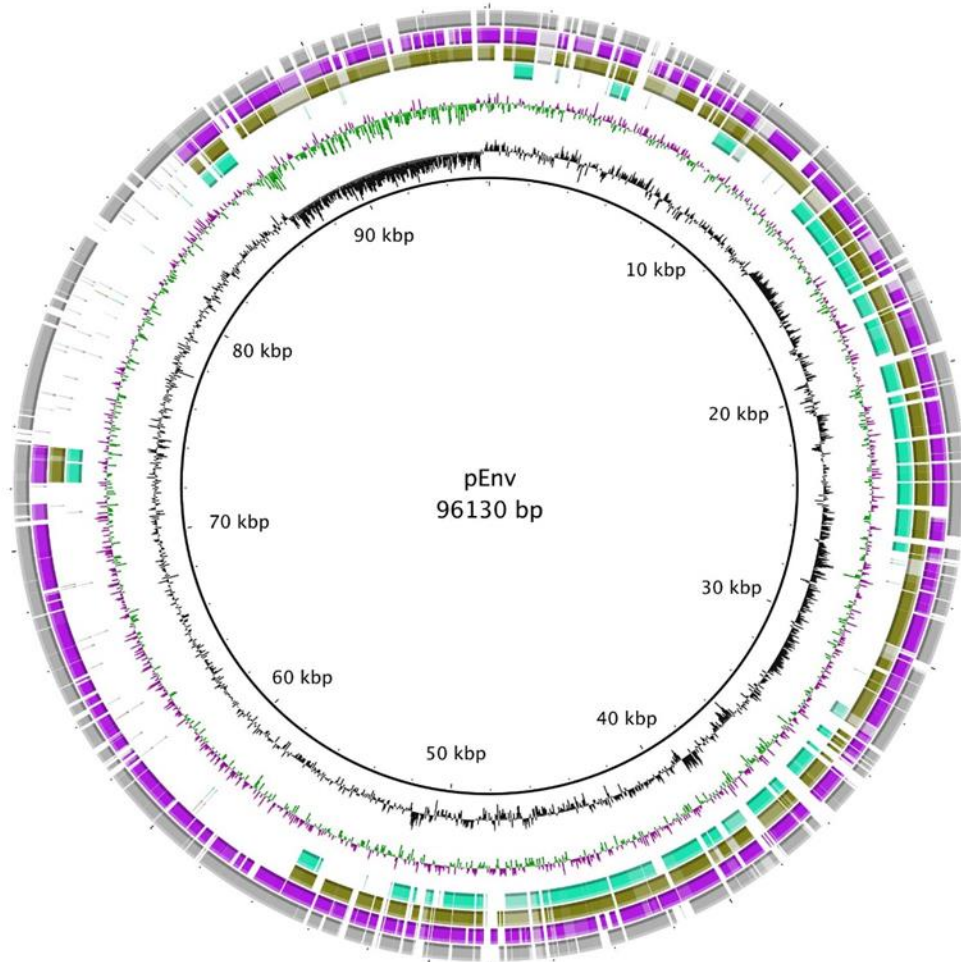

**Suppl. Figure 6.** *bla*<sub>VIM-1</sub>  
IncR plasmids from  
environmental isolates

**Suppl. Figure 7.** InChI2 VIM-plasmid (~325 kb) found in clinical *E. hormaechei* isolate Eho-3 (from cluster I, ST93).

Comparison with pRH-R27 (GenBank acc. number LN555650, ~299 kb) and pSE15-SA01028 (CP026661, ~311 kb), *bla*<sub>VIM-1</sub>-carrying plasmids found in *Salmonella enterica* serovar Infantis from Germany (99.92 %; 90% of query cover). A ~32 kb fragment (including a putative *lac* operon) disrupting an open reading frame encoding for a phosphoadenosine phosphosulfate reductase was detected in pEho-3. The lack of mobile elements flanking this fragment suggest a recombination event.

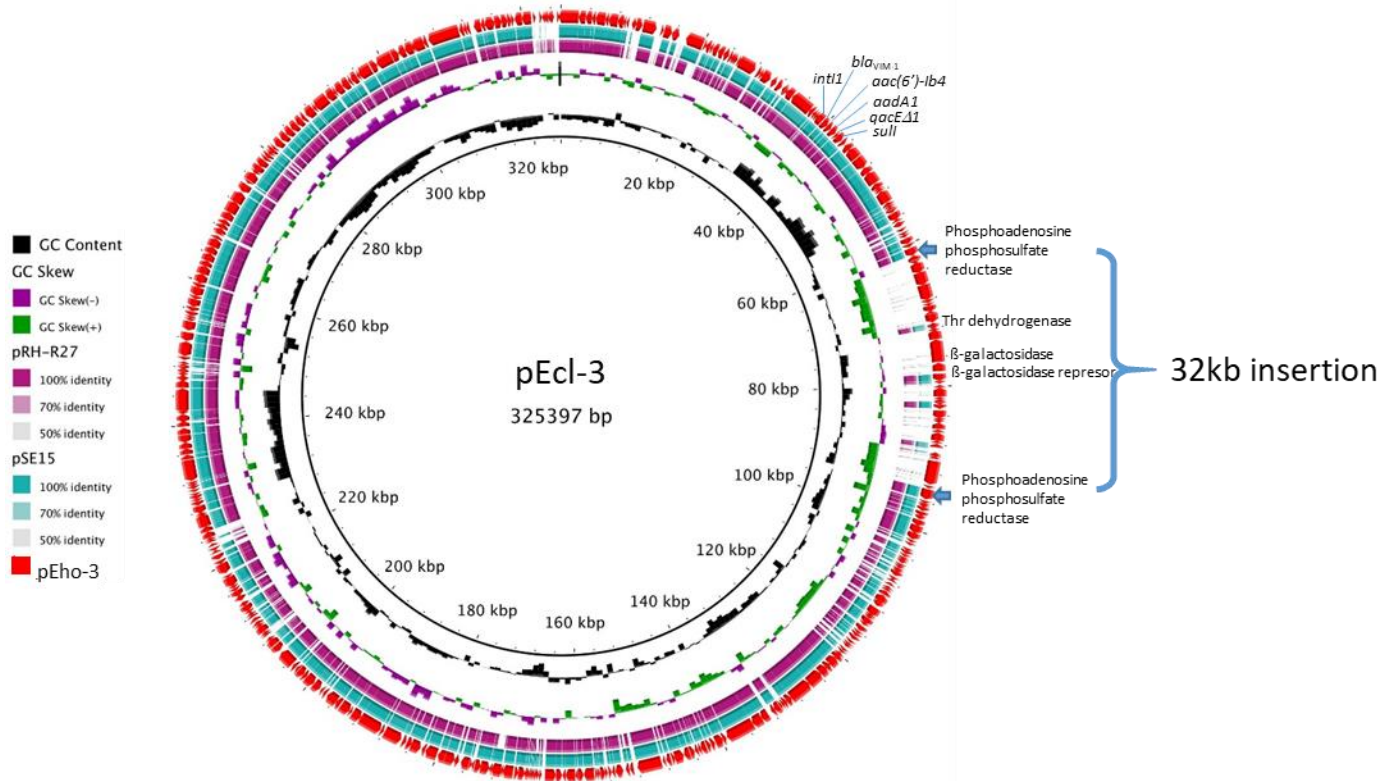



**Table S1. Risk profile of patients with explained (i.e. healthcare visit abroad or epidemiologically and microbiologically established link) and patients with unexplained acquisition of blaVIM-1-positive Enterobacteriaceae**

|                                        | All patients<br>(N=14) | Explained<br>(N=7) | Unexplained<br>(N=7) | P-value     |
|----------------------------------------|------------------------|--------------------|----------------------|-------------|
| <b>Demographics</b>                    |                        |                    |                      |             |
| Male sex (%)                           | 7 (50.0)               | 5 (71.4)           | 2 (28.6)             | 0.29        |
| Age in years, median (range)           | 76.5 (24-90)           | 71 (24-80)         | 87 (65-90)           | <b>0.03</b> |
| Clinical samples                       | 8 (57.1)               | 4 (57.1)           | 4 (57.1)             | 1           |
| <b>Comorbidities</b>                   |                        |                    |                      |             |
| Charlson score, median (range)         | 3 (0-7)                | 4 (0-5)            | 2 (1-7)              | 0.75        |
| Diabetes mellitus                      | 5 (35.7)               | 4 (57.1)           | 1 (14.3)             | 0.27        |
| Cancer                                 | 4 (28.6)               | 1 (14.3)           | 3 (42.9)             | 0.56        |
| Chronic kidney disease                 | 5 (35.7)               | 3 (42.9)           | 2 (28.6)             | 1           |
| Dialysis                               | 3 (21.4)               | 3 (42.9)           | 0 (0.0)              | 0.19        |
| Dementia                               | 5 (35.7)               | 1 (14.3)           | 4 (57.1)             | 0.27        |
| <b>Epidemiological exposures*</b>      |                        |                    |                      |             |
| Community-acquired†                    | 1 (7.1)                | 0 (0.0)            | 1 (14.3)             | 0.56        |
| Nursing home resident                  | 3 (21.4)               | 0 (0.0)            | 3 (42.9)             | 0.19        |
| Intensive care stay                    | 6 (42.9)               | 4 (57.1)           | 2 (28.6)             | 0.59        |
| Outpatient visits, median (range)      | 2 (0-8)                | 1 (0-8)            | 3 (0-8)              | 0.9         |
| <b>Antibiotic resistant pathogens*</b> |                        |                    |                      |             |
| MRSA                                   | 2 (14.3)               | 0 (0)              | 2 (28.6)             | 0.46        |
| ESBL                                   | 4 (28.6)               | 1 (14.3)           | 3 (42.9)             | 0.56        |
| <b>Medical interventions*</b>          |                        |                    |                      |             |
| Colonoscopy                            | 2 (14.3)               | 1 (14.3)           | 1 (14.3)             | 1           |
| Gastroscopy                            | 3 (21.4)               | 1 (14.3)           | 2 (28.6)             | 1           |
| Foley catheter                         | 7 (50.0)               | 3 (42.9)           | 4 (57.1)             | 1           |
| Cystoscopy                             | 2 (14.3)               | 1 (14.3)           | 1 (14.3)             | 1           |
| Surgery                                | 4 (28.6)               | 0 (0.0)            | 4 (57.1)             | 0.07        |
| Central venous catheter                | 3 (21.4)               | 3 (42.9)           | 0 (0.0)              | 0.19        |
| Blood transfusion                      | 3 (21.4)               | 1 (14.3)           | 2 (28.6)             | 1           |
| <b>Medication*</b>                     |                        |                    |                      |             |
| Antibiotics                            | 5 (35.7)               | 7 (100.0)          | 5 (71.4)             | 0.46        |
| Proton-Pump Inhibitors                 | 6 (42.9)               | 3 (42.9)           | 3 (42.9)             | 1           |

\*All within 1 year before VIM detection

†No previous hospital admission, no nursing home resident, no dialysis

**Table S2. Characteristics of the VIM-positive isolates included in this study**

|                               | Isolate       | Type           | Species              | Enzyme | Source         | Isolation date | MLST | Plasmid   |               | Integron |
|-------------------------------|---------------|----------------|----------------------|--------|----------------|----------------|------|-----------|---------------|----------|
|                               |               |                |                      |        |                |                |      | Size (bp) | Replicon      |          |
|                               | Eho-1         | Clinical       | <i>E. hormaechei</i> | VIM-1  | Rectal         | 1-Sep-2012     | 92   | 178'304   | IncFIB-IncFII | In110    |
| <b>CLUSTER I</b>              | Eho-2         | Clinical       | <i>E. hormaechei</i> | VIM-1  | Urine          | 12-Jul-2011    | 93   | 37'703    | IncR          | In110    |
|                               | Eho-3         | Clinical       | <i>E. hormaechei</i> | VIM-1  | Urine          | 10-Aug-2011    | 93   | 325'397   | IncHI2        | In110    |
|                               | Eho-4         | Clinical       | <i>E. hormaechei</i> | VIM-1  | Urine          | 18-Feb-2012    | 93   | 37'460    | IncR          | In110    |
|                               | Eho-5         | Clinical       | <i>E. hormaechei</i> | VIM-1  | Urine          | 20-Jun-2012    | 93   | 37'715    | IncR          | In110    |
|                               | <b>Eho-E1</b> | <b>Environ</b> | <i>E. hormaechei</i> | VIM-1  | Surface water  | 4-Aug-2015     | 93   | 65'162    | IncR          | In110    |
| <b>CLUSTER II</b>             | Eho-6         | Clinical       | <i>E. hormaechei</i> | VIM-1  | Rectal         | 25-Feb-2014    | 269  | 33'171    | IncR          | In110    |
|                               | Eho-7         | Clinical       | <i>E. hormaechei</i> | VIM-1  | Urine          | 2-Jul-2014     | 269  | 33'060    | IncR          | In110    |
|                               | Eho-8         | Clinical       | <i>E. hormaechei</i> | VIM-1  | Dialysis fluid | 2-Jun-2015     | 269  | 32'990    | IncR          | In110    |
|                               | Eho-9         | Clinical       | <i>E. hormaechei</i> | VIM-1  | Dialysis fluid | 27-Sep-2015    | 269  | 33'024    | IncR          | In110    |
|                               | Eho-10        | Clinical       | <i>E. hormaechei</i> | VIM-1  | Rectal         | 18-Jan-2016    | 269  | 33'171    | IncR          | In110    |
|                               | Eho-11        | Clinical       | <i>E. hormaechei</i> | VIM-1  | Rectal         | 18-Jan-2016    | 269  | 32'697    | IncR          | In110    |
|                               | <b>Eho-E2</b> | <b>Environ</b> | <i>E. hormaechei</i> | VIM-1  | Sewage water   | 23-Jul-2015    | 269  | 33'171    | IncR          | In110    |
| <b>Other species</b>          | Cfr-12        | Clinical       | <i>C. freundii</i>   | VIM-2  | Sputum         | 28-Feb-2014    | 129  | 30'361    | No hit found  | In58     |
|                               | Cfr-13a       | Clinical       | <i>C. freundii</i>   | VIM-1  | Rectal         | 21-Dec-2015    | New  | 81'066    | IncN-IncR     | In110    |
|                               | Kpn-13b       | Clinical       | <i>K. pneumoniae</i> | VIM-1  | Rectal         | 14-Dec-2015    | 17   | 81'960    | IncN-IncR     | In110    |
|                               | Kpn-14        | Clinical       | <i>K. pneumoniae</i> | VIM-1  | Rectal         | 29-Sep-2014    | 376  | 150'505   | IncA/C2       | In110    |
|                               | Eco-15        | Clinical       | <i>E. coli</i>       | VIM-1  | Rectal         | 26-Nov-2015    | 131  | 152'546   | IncA/C        | In110    |
| <b>Other Ecl env isolates</b> | <b>Eho-E3</b> | <b>Environ</b> | <i>E. hormaechei</i> | VIM-1  | Surface water  | 4-Aug-2015     | 93   | 96,194 bp | IncR          | In1772   |
|                               | <b>Eho-E4</b> | <b>Environ</b> | <i>E. hormaechei</i> | VIM-1  | Surface water  | 4-Aug-2015     | 93   | 83,090 bp | IncR          | In1772   |

\*MIC, Minimal Inhibitory Concentration

FOX, Cefoxitin; CAZ, Ceftazidime; CTX, Cefotaxime; FEP, Cefepime; AZT, Aztreonam; ETP, Ertapenem; MEM, Meropenem; IMI, Imipenem; AMK, Amikacin; GEN, Gentamicin; NAL, Nalidixic acid; CIP, Ciprofloxacin; TGC, Tigecyclin; FOS, Fosfomycin; SXT, Sulfamethoxazol-Trimethoprim; COL, Colistin

**Table S2. Characteristics of the VIM-positive isolates included in this study**

|                               | Isolate | MIC* (µg/ml) |      |      |      |      |      |     |     |     |       |      |       |       |       |     |       |
|-------------------------------|---------|--------------|------|------|------|------|------|-----|-----|-----|-------|------|-------|-------|-------|-----|-------|
|                               |         | FOX          | CAZ  | CTX  | FEP  | AZT  | ETP  | MEM | IMI | AMK | GEN   | NAL  | CIP   | TGC   | FOS   | SXT | COL   |
|                               | Eho-1   | ≥256         | ≥256 | ≥256 | 96   | 8    | 2    | 4   | 12  | 64  | 96    | 32   | 6     | 0.5   | 24    | ≥32 | 0.125 |
| <b>CLUSTER I</b>              | Eho-2   | 256          | ≥256 | 192  | 32   | 0.12 | ≥8   | 16  | 8   | 2   | 24    | ≥256 | ≥32   | 1     | 32    | ≥32 | 0.125 |
|                               | Eho-3   | ≥256         | ≥256 | ≥256 | 256  | 4    | ≥8   | 8   | 16  | 3   | 2     | ≥256 | ≥32   | 0.25  | 6     | ≥32 | 0.125 |
|                               | Eho-4   | ≥256         | ≥256 | ≥256 | 256  | 1    | 8    | 16  | 8   | 2   | 32    | ≥256 | ≥32   | 0.75  | 32    | ≥32 | 0.094 |
|                               | Eho-5   | ≥256         | ≥256 | 256  | 64   | 4    | ≥8   | 12  | 16  | 3   | 96    | ≥256 | ≥32   | 0.5   | 12    | ≥32 | 0.125 |
|                               | Eho-E1  | ≥256         | ≥256 | ≥256 | 64   | 2    | ≥8   | 16  | 12  | 3   | 1     | ≥256 | ≥32   | 0.5   | 24    | ≥32 | 0.094 |
| <b>CLUSTER II</b>             | Eho-6   | ≥256         | ≥256 | 128  | 24   | 2    | 4    | 1.5 | 6   | 8   | 2     | 16   | 2     | 0.19  | 0.38  | ≥32 | 0.094 |
|                               | Eho-7   | ≥256         | ≥256 | 256  | 24   | 4    | 2    | 8   | 8   | 8   | 2     | 16   | 3     | 0.19  | 0.094 | ≥32 | 0.125 |
|                               | Eho-8   | ≥256         | ≥256 | 128  | 24   | 2    | 2    | 12  | 8   | 6   | 2     | 8    | 3     | 0.125 | 0.25  | ≥32 | 0.094 |
|                               | Eho-9   | ≥256         | ≥256 | 256  | 64   | 2    | 2    | 2   | 4   | 6   | 2     | 12   | 4     | 0.19  | 0.5   | ≥32 | 0.094 |
|                               | Eho-10  | ≥256         | ≥256 | 128  | 48   | 2    | 2    | 1.5 | 4   | 2   | 1.5   | 12   | 0.75  | 0.25  | 8     | ≥32 | 0.094 |
|                               | Eho-11  | ≥256         | ≥256 | 192  | 32   | 2    | 2    | 1.5 | 4   | 12  | 3     | 16   | 4     | 0.38  | 0.75  | ≥32 | 0.094 |
|                               | Eho-E2  | ≥256         | ≥256 | 192  | 64   | 0.25 | 2    | 1.5 | 16  | 8   | 2     | 16   | 2     | 0.19  | 12    | ≥32 | 0.094 |
| <b>Other species</b>          | Cfr-12  | ≥256         | 24   | 64   | 1    | 2    | 2    | 0.5 | 1.5 | 48  | ≥1024 | ≥256 | ≥32   | 0.38  | 0.5   | 0.5 | 0.125 |
|                               | Cfr-13a | ≥256         | ≥256 | 256  | 64   | 0.06 | 0.25 | 1   | 4   | 1.5 | 1.5   | 8    | 0.25  | 0.094 | 0.5   | ≥32 | 0.094 |
|                               | Kpn-13b | 128          | ≥256 | 48   | 12   | 0.03 | 1    | 1.5 | 8   | 2   | 1.5   | 8    | 1     | 0.19  | 32    | ≥32 | 0.125 |
|                               | Kpn-14  | ≥256         | ≥256 | ≥256 | ≥256 | ≥256 | ≥8   | ≥32 | ≥32 | 128 | 64    | ≥256 | ≥32   | 0.25  | ≥1024 | ≥32 | 0.125 |
|                               | Eco-15  | 32           | 48   | 8    | 4    | 8    | 0.06 | 16  | 0.5 | 2   | 1     | 6    | 0.032 | 0.094 | 1     | ≥32 | 0.094 |
| <b>Other Ecl env isolates</b> | Eho-E3  | ≥256         | ≥256 | ≥256 | 64   | 4    | ≥8   | 12  | 8   | 4   | 1.5   | ≥256 | ≥32   | 1     | 24    | ≥32 | 0.094 |
|                               | Eho-E4  | ≥256         | ≥256 | 256  | 64   | 2    | ≥8   | 4   | 8   | 4   | 1.5   | ≥256 | ≥32   | 0.75  | 16    | ≥32 | 0.094 |

\*MIC, Minimal Inhibitory Concentration

FOX, Cefoxitin; CAZ, Ceftazidime; CTX, Cefotaxime; FEP, Cefepime; AZT, Aztreonam; ETP, Ertapenem; MEM, Meropenem; IMI, Imipenem; AMK, Amikacin; GEN, Gentamicin; NAL, Nalidixic acid; CIP, Ciprofloxacin; TGC, Tigecyclin; FOS, Fosfomycin; SXT, Sulfamethoxazol-Trimethoprim; COL, Colistin



**Table S3. Resistance genotypes and predicted phenotypes as well as plasmid replicon types of all isolates.**

|                  | Isolate ID           | Genotype                                                                                                                                                                         | Predicted Phenotype                                                                                                                                                                                                                                | Plasmid                                                     |
|------------------|----------------------|----------------------------------------------------------------------------------------------------------------------------------------------------------------------------------|----------------------------------------------------------------------------------------------------------------------------------------------------------------------------------------------------------------------------------------------------|-------------------------------------------------------------|
|                  | <b>Eho-1/GN1534</b>  | aac(3)-IIa, aac(6')-Ib-cr, aac(6')-Ib3, aadA1, aph(3')-VIa, blaACT-16, blaOXA-1, blaVIM-1, catB4, dfrA14, qnrB1, sul1                                                            | gentamicin, ciprofloxacin I/R, streptomycin, kanamycin, ampicillin, amoxicillin/clavulanic acid, ceftiofur, ceftriaxone, meropenem, chloramphenicol, trimethoprim, sulfisoxazole                                                                   | IncFIB(pEhoA), IncFII(pEhoA), IncQ1                         |
| <b>CLUSTER I</b> | <b>Eho-2/GN719</b>   | aac(6')-Ib-cr, aac(6')-Ib3, aadA1, ant(2'')-Ia, aph(6)-Id, blaACT-7, blaTEM-1B, blaVIM-1, dfrA14, fosA, mph(A), qnrS1, strA, sul1, tet(A)                                        | ciprofloxacin I/R, gentamicin, streptomycin, kanamycin, ampicillin, amoxicillin/clavulanic acid, ceftiofur, ceftriaxone, meropenem, trimethoprim, fosfomycin, erythromycin, azithromycin, sulfisoxazole, tetracycline                              | IncFII(Yp), IncN, IncR                                      |
|                  | <b>Eho-3/GN738</b>   | aac(6')-Ib-cr, aac(6')-Ib3, aadA1, aph(6)-Id, blaACC-1, blaACT-7, blaVIM-1, catA1, dfrA14, fosA, qnrS1, strA, sul1                                                               | ciprofloxacin I/R, gentamicin, streptomycin, kanamycin, ampicillin, amoxicillin/clavulanic acid, ceftiofur, ceftriaxone, meropenem, chloramphenicol, trimethoprim, fosfomycin, sulfisoxazole                                                       | IncHI2, IncN                                                |
|                  | <b>Eho-4/GN825</b>   | aac(3)-IIId, aac(6')-Ib-cr, aac(6')-Ib3, aadA1, aadA1b, ant(2'')-Ia, aph(6)-Id, blaACC-1, blaACT-7, blaTEM-1B, blaVIM-1, catA1, dfrA14, ere(A), fosA, mph(A), strA, sul1, tet(A) | gentamicin, ciprofloxacin I/R, streptomycin, kanamycin, ampicillin, amoxicillin/clavulanic acid, ceftiofur, ceftriaxone, meropenem, chloramphenicol, trimethoprim, erythromycin, azithromycin, fosfomycin, sulfisoxazole, tetracycline             | Col156, IncFII(29), IncFII(Yp), IncHI2, IncHI2A, IncN, IncR |
|                  | <b>Eho-5/GN882</b>   | aac(3)-IIId, aac(6')-Ib-cr, aac(6')-Ib3, aadA1, aadA2, aph(6)-Id, blaACC-1, blaACT-7, blaTEM-1B, blaVIM-1, catA1, dfrA12, dfrA14, fosA, mph(A), qnrS1, strA, sul1, tet(A)        | gentamicin, ciprofloxacin I/R, streptomycin, kanamycin, ampicillin, amoxicillin/clavulanic acid, ceftiofur, ceftriaxone, meropenem, chloramphenicol, trimethoprim, fosfomycin, erythromycin, azithromycin, sulfisoxazole, tetracycline             | IncHI2, IncHI2A, IncN, IncR                                 |
|                  | <b>Eho-E1/GN1533</b> | aac(6')-Ib-cr, aac(6')-Ib3, aadA1, aadA16, aph(6)-Id, ARR-3, blaACC-1, blaACT-7, blaVIM-1, dfrA27, floR, fosA, mph(A), qnrB6, strA, sul1, sul2, tet(A)                           | ciprofloxacin I/R, gentamicin, streptomycin, kanamycin, rifampicin, ampicillin, amoxicillin/clavulanic acid, ceftiofur, ceftriaxone, meropenem, trimethoprim, chloramphenicol, fosfomycin, erythromycin, azithromycin, sulfisoxazole, tetracycline | IncHI2, IncHI2A, IncN, IncR, IncX5                          |



|            |                      |                                                                                                                                                                                                          |                                                                                                                                                                                                                                    |                       |
|------------|----------------------|----------------------------------------------------------------------------------------------------------------------------------------------------------------------------------------------------------|------------------------------------------------------------------------------------------------------------------------------------------------------------------------------------------------------------------------------------|-----------------------|
| CLUSTER II | <b>Eho-6/GN1550</b>  | aac(6')-Ib-cr, aac(6')-Ib3, aadA1, ant(3'')-Ia, aph(3'')-Ib, aph(6)-Id, blaCTX-M-15, blaOXA-1, blaTEM-1B, blaVIM-1, catA1, catB4, dfrA14, mph(A), qnrB1, qnrS1, sul1, sul2                               | ciprofloxacin I/R, gentamicin, streptomycin, kanamycin, ampicillin, ceftriaxone, amoxicillin/clavulanic acid, ceftiofloxacin, meropenem, chloramphenicol, chloramphenicol, trimethoprim, erythromycin, azithromycin, sulfisoxazole | InCHI2, InCHI2A, IncR |
|            | <b>Eho-7/GN1157</b>  | aac(6')-Ib-cr, aac(6')-Ib3, aadA1, ant(3'')-Ia, aph(3'')-Ib, aph(6)-Id, blaCTX-M-15, blaOXA-1, blaTEM-1B, blaVIM-1, catA1, catB4, dfrA14, mph(A), qnrB1, qnrS1, sul1, sul2                               | ciprofloxacin I/R, gentamicin, streptomycin, kanamycin, ampicillin, ceftriaxone, amoxicillin/clavulanic acid, ceftiofloxacin, meropenem, chloramphenicol, chloramphenicol, trimethoprim, erythromycin, azithromycin, sulfisoxazole | InCHI2, InCHI2A, IncR |
|            | <b>Eho-8/GN1318</b>  | aac(6')-Ib-cr, aac(6')-Ib3, aadA1, ant(3'')-Ia, aph(3'')-Ib, aph(6)-Id, blaCTX-M-15, blaOXA-1, blaTEM-1B, blaVIM-1, catA1, catB4, dfrA14, mph(A), qnrB1, qnrS1, sul1, sul2                               | ciprofloxacin I/R, gentamicin, streptomycin, kanamycin, ampicillin, ceftriaxone, amoxicillin/clavulanic acid, ceftiofloxacin, meropenem, chloramphenicol, chloramphenicol, trimethoprim, erythromycin, azithromycin, sulfisoxazole | InCHI2, InCHI2A, IncR |
|            | <b>Eho-9/GN1494</b>  | aac(6')-Ib-cr, aac(6')-Ib-cr, aac(6')-Ib-cr, aac(6')-Ib3, aadA1, ant(3'')-Ia, aph(3'')-Ib, aph(6)-Id, blaCTX-M-15, blaOXA-1, blaTEM-1B, blaVIM-1, catA1, catB4, dfrA14, mph(A), qnrB1, qnrS1, sul1, sul2 | gentamicin, ciprofloxacin I/R, streptomycin, kanamycin, ampicillin, ceftriaxone, amoxicillin/clavulanic acid, ceftiofloxacin, meropenem, chloramphenicol, chloramphenicol, trimethoprim, erythromycin, azithromycin, sulfisoxazole | InCHI2, InCHI2A, IncR |
|            | <b>Eho-10/GN1549</b> | aac(6')-Ib-cr, aac(6')-Ib3, aadA1, ant(3'')-Ia, aph(3'')-Ib, aph(6)-Id, blaCTX-M-15, blaTEM-1B, blaVIM-1, catA1, dfrA14, mph(A), qnrB1, qnrS1, sul1, sul2                                                | ciprofloxacin I/R, gentamicin, streptomycin, kanamycin, ampicillin, ceftriaxone, amoxicillin/clavulanic acid, ceftiofloxacin, meropenem, chloramphenicol, trimethoprim, erythromycin, azithromycin, sulfisoxazole                  | InCHI2, InCHI2A, IncR |
|            | <b>Eho-11/GN1555</b> | aac(6')-Ib-cr, aac(6')-Ib3, aadA1, ant(3'')-Ia, aph(3'')-Ib, aph(6)-Id, blaCTX-M-15, blaOXA-1, blaTEM-1B, blaVIM-1, catA1, catB4, dfrA14, mph(A), qnrB1, qnrS1, sul1, sul2                               | ciprofloxacin I/R, gentamicin, streptomycin, kanamycin, ampicillin, ceftriaxone, amoxicillin/clavulanic acid, ceftiofloxacin, meropenem, chloramphenicol, chloramphenicol, trimethoprim, erythromycin, azithromycin, sulfisoxazole | InCHI2, InCHI2A, IncR |
|            | <b>Eho-E2/GN1532</b> | aac(6')-Ib-cr, aac(6')-Ib3, aadA1, blaOXA-1, blaVIM-1, catB4, dfrA14, mph(A), qnrB1, qnrS1, sul1                                                                                                         | ciprofloxacin I/R, gentamicin, streptomycin, ampicillin, amoxicillin/clavulanic acid, ceftiofloxacin, ceftriaxone, meropenem, chloramphenicol, trimethoprim, erythromycin, azithromycin, sulfisoxazole                             | InCHI2, InCHI2A, IncR |

|                      |                        |                                                                                                                                                                                                   |                                                                                                                                                                                                                            |                                                                                                                                                                                                                       |
|----------------------|------------------------|---------------------------------------------------------------------------------------------------------------------------------------------------------------------------------------------------|----------------------------------------------------------------------------------------------------------------------------------------------------------------------------------------------------------------------------|-----------------------------------------------------------------------------------------------------------------------------------------------------------------------------------------------------------------------|
| OTHER SPECIES        | <b>Cfr-12/GN1092</b>   | aac(3)-Ia, aac(3)-IIId, aac(6')-Ib-cr, aac(6')-Ib3, aac(6')-II, aph(3')-Ia, ARR-3, blaCMY-39, blaOXA-1, blaTEM-1B, blaVIM-2, catB4, mph(A), qnrA1, qnrB13, sul1                                   | gentamicin, ciprofloxacin I/R, kanamycin, rifampicin, ampicillin, amoxicillin/clavulanic acid, ceftioxin, ceftriaxone, meropenem, chloramphenicol, erythromycin, azithromycin, sulfisoxazole                               | IncHI2, IncHI2A, IncR                                                                                                                                                                                                 |
|                      | <b>Cfr-13a/GN1762</b>  | aac(6')-Ib-cr, aac(6')-Ib3, aadA1, blaCMY-34, blaVIM-1, dfrA14, mph(A), qnrB9, qnrS1, sul1                                                                                                        | ciprofloxacin I/R, gentamicin, streptomycin, ampicillin, amoxicillin/clavulanic acid, ceftioxin, ceftriaxone, meropenem, trimethoprim, erythromycin, azithromycin, sulfisoxazole                                           | IncN, IncR                                                                                                                                                                                                            |
|                      | <b>Kpn-13b/GN1763</b>  | aac(6')-Ib-cr, aac(6')-Ib3, aadA1, blaSHV-11, blaVIM-1, dfrA14, fosA, mph(A), oqxA, oqxB, qnrS1, sul1                                                                                             | ciprofloxacin I/R, gentamicin, streptomycin, ampicillin, amoxicillin/clavulanic acid, ceftioxin, ceftriaxone, meropenem, trimethoprim, fosfomycin, erythromycin, azithromycin, chloramphenicol, sulfisoxazole              | IncN, IncR                                                                                                                                                                                                            |
|                      | <b>Kpn-14/GN1761</b>   | aac(3)-IIa, aac(6')-II, aadA15, ant(3'')-Ia, aph(3')-Ia, aph(3')-VIb, aph(6)-Id, blaCMY-2, blaCTX-M-14b, blaSHV-1, blaTEM-1B, blaVIM-1, catA1, dfrA1, fosA, oqxA, oqxB, qnrS1, strA, sul1, tet(B) | gentamicin, streptomycin, kanamycin, ampicillin, amoxicillin/clavulanic acid, ceftioxin, ceftriaxone, meropenem, chloramphenicol, trimethoprim, fosfomycin, ciprofloxacin I/R, sulfisoxazole, tetracycline                 | IncA/C2, IncFIB(K), IncFII(K), IncHI1B, IncL/M(pMU407)                                                                                                                                                                |
|                      | <b>Eco-15/GN1765</b>   | aac(6')-Ib-cr, aac(6')-Ib3, aadA1, aph(3')-XV, blaSHV-12, blaVIM-1, catB2, dfrA14, mph(A), sul1, tet(B)                                                                                           | ciprofloxacin I/R, gentamicin, streptomycin, kanamycin, ampicillin, ceftriaxone, amoxicillin/clavulanic acid, ceftioxin, meropenem, chloramphenicol, trimethoprim, erythromycin, azithromycin, sulfisoxazole, tetracycline | Col156, IncA/C, IncFII(29)                                                                                                                                                                                            |
|                      | Other Ecl env isolates | <b>Eho-E3/GN1768</b>                                                                                                                                                                              | aac(6')-Ib-cr, aac(6')-Ib3, aadA1, aadA16, aph(6)-Id, ARR-3, blaACC-1, blaACT-7, blaVIM-1, dfrA27, mph(A), qnrB6, strA, sul1, sul2, tet(A)                                                                                 | gentamicin, ciprofloxacin I/R, streptomycin, kanamycin, rifampicin, ampicillin, amoxicillin/clavulanic acid, ceftioxin, ceftriaxone, meropenem, trimethoprim, erythromycin, azithromycin, sulfisoxazole, tetracycline |
| <b>Eho-E4/GN1766</b> |                        | aac(6')-Ib-cr, aac(6')-Ib3, aadA1, aadA16, aph(6)-Id, ARR-3, blaACC-1, blaACT-7, blaVIM-1, dfrA27, mph(A), qnrB6, strA, sul1, sul2, tet(A)                                                        | ciprofloxacin I/R, gentamicin, streptomycin, kanamycin, rifampicin, ampicillin, amoxicillin/clavulanic acid, ceftioxin, ceftriaxone, meropenem, trimethoprim, erythromycin, azithromycin, sulfisoxazole, tetracycline      | IncHI2, IncHI2A, IncN, IncR, IncX5                                                                                                                                                                                    |

**Table S4. Results of PlasmidFinder**

| Isolate ID   | Plasmid       | %Identity | %Overlap | HSP Length/Total Length | Contig | Start  | End    | Accession |
|--------------|---------------|-----------|----------|-------------------------|--------|--------|--------|-----------|
| Eho-1/GN1534 | IncFIB(pEhoA) | 100       | 100      | 560/560                 | 2      | 35915  | 36474  | CP001919  |
| Eho-1/GN1534 | IncFII(pEhoA) | 100       | 100      | 747/747                 | 2      | 3      | 749    | CP001919  |
| Eho-1/GN1534 | IncQ1         | 100       | 81.28    | 647/796                 | 3      | 647    | 1      | M28829.1  |
| Eho-2/GN719  | IncFII(Yp)    | 99.52     | 90.87    | 209/230                 | 2      | 105039 | 105247 | CP000670  |
| Eho-2/GN719  | IncN          | 99.61     | 100      | 514/514                 | 3      | 39     | 552    | AY046276  |
| Eho-2/GN719  | IncR          | 100       | 100      | 251/251                 | 4      | 9889   | 10139  | DQ449578  |
| Eho-3/GN738  | IncHI2        | 100       | 100      | 327/327                 | 2      | 15542  | 15868  | BX664015  |
| Eho-3/GN738  | IncN          | 99.61     | 100      | 514/514                 | 4      | 39     | 552    | AY046276  |
| Eho-4/GN825  | Col156        | 98.7      | 100      | 154/154                 | 3      | 20270  | 20423  | 009781    |
| Eho-4/GN825  | IncFII(29)    | 99.61     | 100      | 259/259                 | 3      | 45041  | 45299  | CP003035  |
| Eho-4/GN825  | IncFII(Yp)    | 99.52     | 90.87    | 209/230                 | 4      | 105039 | 105247 | CP000670  |
| Eho-4/GN825  | IncHI2        | 100       | 100      | 327/327                 | 2      | 329621 | 329295 | BX664015  |
| Eho-4/GN825  | IncHI2A       | 100       | 100      | 630/630                 | 2      | 211    | 840    | BX664015  |
| Eho-4/GN825  | IncN          | 99.61     | 100      | 514/514                 | 5      | 39     | 552    | AY046276  |
| Eho-4/GN825  | IncR          | 100       | 100      | 251/251                 | 6      | 25273  | 25523  | DQ449578  |
| Eho-5/GN882  | IncHI2        | 100       | 100      | 327/327                 | 2      | 295831 | 295505 | BX664015  |
| Eho-5/GN882  | IncHI2A       | 100       | 100      | 630/630                 | 2      | 211    | 840    | BX664015  |
| Eho-5/GN882  | IncN          | 99.61     | 100      | 514/514                 | 2      | 113678 | 114191 | AY046276  |
| Eho-5/GN882  | IncR          | 100       | 100      | 251/251                 | 3      | 22185  | 21935  | DQ449578  |
| Eho-6/GN1550 | IncHI2        | 100       | 100      | 327/327                 | 2      | 295128 | 294802 | BX664015  |
| Eho-6/GN1550 | IncHI2A       | 100       | 100      | 630/630                 | 2      | 211    | 840    | BX664015  |
| Eho-6/GN1550 | IncR          | 100       | 100      | 251/251                 | 4      | 13123  | 13373  | DQ449578  |
| Eho-7/GN1157 | IncHI2        | 100       | 100      | 327/327                 | 2      | 289263 | 288937 | BX664015  |
| Eho-7/GN1157 | IncHI2A       | 100       | 100      | 630/630                 | 2      | 211    | 840    | BX664015  |
| Eho-7/GN1157 | IncR          | 100       | 100      | 251/251                 | 6      | 24568  | 24818  | DQ449578  |
| Eho-8/GN1318 | IncHI2        | 100       | 100      | 327/327                 | 2      | 292818 | 292492 | BX664015  |
| Eho-8/GN1318 | IncHI2A       | 100       | 100      | 630/630                 | 2      | 211    | 840    | BX664015  |
| Eho-8/GN1318 | IncR          | 100       | 100      | 251/251                 | 5      | 3155   | 3405   | DQ449578  |
| Eho-9/GN1494 | IncHI2        | 100       | 100      | 327/327                 | 2      | 292818 | 292492 | BX664015  |
| Eho-9/GN1494 | IncHI2A       | 100       | 100      | 630/630                 | 2      | 211    | 840    | BX664015  |
| Eho-9/GN1494 | IncR          | 100       | 100      | 251/251                 | 6      | 20006  | 19756  | DQ449578  |

|                       |           |       |                |   |         |                  |
|-----------------------|-----------|-------|----------------|---|---------|------------------|
| <b>Eho-10/GN1549</b>  | IncHI2    | 100   | 100 327/327    | 3 | 272695  | 272369 BX664015  |
| <b>Eho-10/GN1549</b>  | IncHI2A   | 100   | 100 630/630    | 3 | 211     | 840 BX664015     |
| <b>Eho-10/GN1549</b>  | IncR      | 100   | 100 251/251    | 9 | 29830   | 30080 DQ449578   |
| <b>Eho-11/GN1555</b>  | IncHI2    | 100   | 100 327/327    | 2 | 295128  | 294802 BX664015  |
| <b>Eho-11/GN1555</b>  | IncHI2A   | 100   | 100 630/630    | 2 | 211     | 840 BX664015     |
| <b>Eho-11/GN1555</b>  | IncR      | 100   | 100 251/251    | 5 | 29644   | 29894 DQ449578   |
| <b>Eho-E1/GN1533</b>  | IncHI2    | 100   | 100 327/327    | 2 | 317217  | 316891 BX664015  |
| <b>Eho-E1/GN1533</b>  | IncHI2A   | 100   | 100 630/630    | 2 | 211     | 840 BX664015     |
| <b>Eho-E1/GN1533</b>  | IncN      | 99.81 | 100 514/514    | 5 | 39      | 552 AY046276     |
| <b>Eho-E1/GN1533</b>  | IncR      | 100   | 100 251/251    | 4 | 11271   | 11521 DQ449578   |
| <b>Eho-E1/GN1533</b>  | IncX5     | 100   | 100 576/576    | 6 | 7364    | 6789 MF062700.1  |
| <b>Eho-E2/GN1532</b>  | IncHI2    | 100   | 100 327/327    | 1 | 3734347 | 3734673 BX664015 |
| <b>Eho-E2/GN1532</b>  | IncHI2A   | 100   | 100 630/630    | 1 | 3719481 | 3718852 BX664015 |
| <b>Eho-E2/GN1532</b>  | IncR      | 100   | 100 251/251    | 3 | 642     | 392 DQ449578     |
| <b>Eho-E3/GN1768</b>  | IncHI2    | 100   | 100 327/327    | 2 | 117227  | 116901 BX664015  |
| <b>Eho-E3/GN1768</b>  | IncHI2A   | 99.21 | 100.16 631/630 | 2 | 132073  | 132701 BX664015  |
| <b>Eho-E3/GN1768</b>  | IncN      | 98.84 | 100.39 516/514 | 4 | 5167    | 4653 AY046276    |
| <b>Eho-E3/GN1768</b>  | IncR      | 99.6  | 100 251/251    | 3 | 72364   | 72614 DQ449578   |
| <b>Eho-E3/GN1768</b>  | IncX5     | 99.3  | 99.83 575/576  | 5 | 30014   | 29443 MF062700.1 |
| <b>Eho-E4/GN1766</b>  | IncHI2    | 99.69 | 100 327/327    | 2 | 76393   | 76718 BX664015   |
| <b>Eho-E4/GN1766</b>  | IncHI2A   | 99.84 | 100 630/630    | 2 | 61543   | 60915 BX664015   |
| <b>Eho-E4/GN1766</b>  | IncN      | 99.42 | 100 514/514    | 5 | 39      | 552 AY046276     |
| <b>Eho-E4/GN1766</b>  | IncR      | 99.6  | 100 251/251    | 3 | 47022   | 47272 DQ449578   |
| <b>Eho-E4/GN1766</b>  | IncX5     | 99.65 | 99.65 574/576  | 6 | 44119   | 43548 MF062700.1 |
| <b>Cfr-12/GN1092</b>  | IncHI2    | 100   | 100 327/327    | 2 | 366162  | 365836 BX664015  |
| <b>Cfr-12/GN1092</b>  | IncHI2A   | 100   | 100 630/630    | 2 | 211     | 840 BX664015     |
| <b>Cfr-12/GN1092</b>  | IncR      | 100   | 100 251/251    | 4 | 26371   | 26121 DQ449578   |
| <b>Cfr-13a/GN1762</b> | IncN      | 99.61 | 100 514/514    | 3 | 39      | 552 AY046276     |
| <b>Cfr-13a/GN1762</b> | IncR      | 100   | 100 251/251    | 3 | 15001   | 14751 DQ449578   |
| <b>Kpn-13b/GN1763</b> | IncN      | 99.61 | 100 514/514    | 3 | 39      | 552 AY046276     |
| <b>Kpn-13b/GN1763</b> | IncR      | 100   | 100 251/251    | 3 | 16006   | 15756 DQ449578   |
| <b>Kpn-14/GN1761</b>  | IncA/C2   | 100   | 100 417/417    | 4 | 45      | 461 JN157804     |
| <b>Kpn-14/GN1761</b>  | IncFIB(K) | 98.93 | 100 560/560    | 3 | 859     | 300 JN233704     |

|                      |                |       |               |   |        |                 |
|----------------------|----------------|-------|---------------|---|--------|-----------------|
| <b>Kpn-14/GN1761</b> | IncFII(K)      | 98.65 | 100 148/148   | 3 | 119262 | 119115 CP000648 |
| <b>Kpn-14/GN1761</b> | IncHI1B        | 99.47 | 100 570/570   | 2 | 655    | 86 JN420336     |
| <b>Kpn-14/GN1761</b> | IncL/M(pMU407) | 99.55 | 90.66 670/739 | 5 | 72383  | 73052 U27345    |
| <b>Eco-15/GN1765</b> | Col156         | 98.7  | 100 154/154   | 3 | 20275  | 20428 009781    |
| <b>Eco-15/GN1765</b> | IncA/C         | 98.32 | 100 417/417   | 2 | 45     | 461 FJ705807    |
| <b>Eco-15/GN1765</b> | IncFII(29)     | 99.61 | 100 259/259   | 3 | 51867  | 52125 CP003035  |



**Table S5. Summary of multilocus sequence typing results**

| Isolate ID            | Scheme      | Sequence Type | Locus 1  | Locus 2   | Locus 3   | Locus 4   | Locus 5   | Locus 6   | Locus 7   |
|-----------------------|-------------|---------------|----------|-----------|-----------|-----------|-----------|-----------|-----------|
| <b>Eho-1/GN1534</b>   | ecloacae    | 92            | dnaA(52) | fusA(20)  | gyrB(19)  | leuS(44)  | pyrG(45)  | rplB(12)  | rpoB(32)  |
| <b>Eho-2/GN719</b>    | ecloacae    | 93            | dnaA(9)  | fusA(4)   | gyrB(14)  | leuS(61)  | pyrG(37)  | rplB(4)   | rpoB(9)   |
| <b>Eho-3/GN738</b>    | ecloacae    | 93            | dnaA(9)  | fusA(4)   | gyrB(14)  | leuS(61)  | pyrG(37)  | rplB(4)   | rpoB(9)   |
| <b>Eho-4/GN825</b>    | ecloacae    | 93            | dnaA(9)  | fusA(4)   | gyrB(14)  | leuS(61)  | pyrG(37)  | rplB(4)   | rpoB(9)   |
| <b>Eho-5/GN882</b>    | ecloacae    | 93            | dnaA(9)  | fusA(4)   | gyrB(14)  | leuS(61)  | pyrG(37)  | rplB(4)   | rpoB(9)   |
| <b>Eho-6/GN1550</b>   | ecloacae    | 269           | dnaA(95) | fusA(56)  | gyrB(112) | leuS(111) | pyrG(104) | rplB(4)   | rpoB(63)  |
| <b>Eho-7/GN1157</b>   | ecloacae    | 269           | dnaA(95) | fusA(56)  | gyrB(112) | leuS(111) | pyrG(104) | rplB(4)   | rpoB(63)  |
| <b>Eho-8/GN1318</b>   | ecloacae    | 269           | dnaA(95) | fusA(56)  | gyrB(112) | leuS(111) | pyrG(104) | rplB(4)   | rpoB(63)  |
| <b>Eho-9/GN1494</b>   | ecloacae    | 269           | dnaA(95) | fusA(56)  | gyrB(112) | leuS(111) | pyrG(104) | rplB(4)   | rpoB(63)  |
| <b>Eho-10/GN1549</b>  | ecloacae    | 269           | dnaA(95) | fusA(56)  | gyrB(112) | leuS(111) | pyrG(104) | rplB(4)   | rpoB(63)  |
| <b>Eho-11/GN1555</b>  | ecloacae    | 269           | dnaA(95) | fusA(56)  | gyrB(112) | leuS(111) | pyrG(104) | rplB(4)   | rpoB(63)  |
| <b>Eho-E1/GN1533</b>  | ecloacae    | 93            | dnaA(9)  | fusA(4)   | gyrB(14)  | leuS(61)  | pyrG(37)  | rplB(4)   | rpoB(9)   |
| <b>Eho-E2/GN1532</b>  | ecloacae    | 269           | dnaA(95) | fusA(56)  | gyrB(112) | leuS(111) | pyrG(104) | rplB(4)   | rpoB(63)  |
| <b>Eho-E3/GN1768</b>  | ecloacae    | 93            | dnaA(9)  | fusA(4)   | gyrB(14)  | leuS(61)  | pyrG(37)  | rplB(4)   | rpoB(9)   |
| <b>Eho-E4/GN1766</b>  | ecloacae    | 93            | dnaA(9)  | fusA(4)   | gyrB(14)  | leuS(61)  | pyrG(37)  | rplB(4)   | rpoB(9)   |
| <b>Cfr-12/GN1092</b>  | cfreundii   | 129           | aspC(7)  | clpX(6)   | fadD(76)  | mdh(45)   | arcA(3)   | dnaG(45)  | lysP(63)  |
| <b>Cfr-13a/GN1762</b> | cfreundii   | not assigned  | aspC(9)  | clpX(~11) | fadD(4)   | mdh(95)   | arcA(59)  | dnaG(~66) | lysP(106) |
| <b>Kpn-13b/GN1763</b> | kpneumoniae | 17            | gapA(2)  | infB(1)   | mdh(1)    | pgi(1)    | phoE(4)   | rpoB(4)   | tonB(4)   |
| <b>Kpn-14/GN1761</b>  | kpneumoniae | 376           | gapA(2)  | infB(6)   | mdh(1)    | pgi(3)    | phoE(8)   | rpoB(1)   | tonB(27)  |
| <b>Eco-15/GN1765</b>  | ecoli       | 131           | adk(53)  | fumC(40)  | gyrB(47)  | icd(13)   | mdh(36)   | purA(28)  | recA(29)  |

**Table S6. Settings**

| Key                           | Value                                                                                                                                                                                                                                                                                                                                                     |
|-------------------------------|-----------------------------------------------------------------------------------------------------------------------------------------------------------------------------------------------------------------------------------------------------------------------------------------------------------------------------------------------------------|
| command_line                  | /ComputeShed/Applications/anaconda2/envs/staramr/bin/staramr search -o out11 GN1092.fasta GN1157.fasta GN1318.fasta GN1494.fasta GN1532.fasta GN1533.fasta GN1534.fasta GN1534.fasta GN1549.fasta GN1550.fasta GN1555.fasta GN1761.fasta GN1762.fasta GN1763.fasta GN1765.fasta GN1766.fasta GN1768.fasta GN719.fasta GN738.fasta GN825.fasta GN882.fasta |
| version                       | 0.6.1                                                                                                                                                                                                                                                                                                                                                     |
| start_time                    | 2019-12-12 11:40:22                                                                                                                                                                                                                                                                                                                                       |
| end_time                      | 2019-12-12 11:40:45                                                                                                                                                                                                                                                                                                                                       |
| total_minutes                 | 0.38                                                                                                                                                                                                                                                                                                                                                      |
| resfinder_db_dir              | /ComputeShed/Applications/anaconda2/envs/staramr/lib/python3.7/site-packages/staramr/databases/data/dist/resfinder                                                                                                                                                                                                                                        |
| resfinder_db_url              | <a href="https://bitbucket.org/genomicepidemiology/resfinder_db.git">https://bitbucket.org/genomicepidemiology/resfinder_db.git</a>                                                                                                                                                                                                                       |
| resfinder_db_commit           | e8f1eb2585cd9610c4034a54ce7fc4f93aa95535                                                                                                                                                                                                                                                                                                                  |
| resfinder_db_date             | Mon, 16 Jul 2018 16:58                                                                                                                                                                                                                                                                                                                                    |
| pointfinder_db_dir            | /ComputeShed/Applications/anaconda2/envs/staramr/lib/python3.7/site-packages/staramr/databases/data/dist/pointfinder                                                                                                                                                                                                                                      |
| pointfinder_db_url            | <a href="https://bitbucket.org/genomicepidemiology/pointfinder_db.git">https://bitbucket.org/genomicepidemiology/pointfinder_db.git</a>                                                                                                                                                                                                                   |
| pointfinder_db_commit         | 8706a6363bb29e47e0e398c53043b037c24b99a7                                                                                                                                                                                                                                                                                                                  |
| pointfinder_db_date           | Wed, 04 Jul 2018 14:27                                                                                                                                                                                                                                                                                                                                    |
| plasmidfinder_db_dir          | /ComputeShed/Applications/anaconda2/envs/staramr/lib/python3.7/site-packages/staramr/databases/data/dist/plasmidfinder                                                                                                                                                                                                                                    |
| plasmidfinder_db_url          | <a href="https://bitbucket.org/genomicepidemiology/plasmidfinder_db.git">https://bitbucket.org/genomicepidemiology/plasmidfinder_db.git</a>                                                                                                                                                                                                               |
| plasmidfinder_db_commit       | 81919954cbedaff39056610ab584ab4c06011ed8                                                                                                                                                                                                                                                                                                                  |
| plasmidfinder_db_date         | Tue, 20 Nov 2018 08:51                                                                                                                                                                                                                                                                                                                                    |
| m1st_version                  | 2.11                                                                                                                                                                                                                                                                                                                                                      |
| pointfinder_gene_drug_version | 050218                                                                                                                                                                                                                                                                                                                                                    |
| resfinder_gene_drug_version   | 050218.1                                                                                                                                                                                                                                                                                                                                                  |
